# Supplementary material for: A systematic review of metabolomic profiling of gastric cancer and esophageal cancer
Source: PubMed Central journal article supplement (PMC7142846; doi:10.20892/j.issn.2095-3941.2019.0348), 2020-02-15
Supplement: cbm-17-181-s001.pdf [file cbm-17-181-s001.pdf]

# Supplementary materials

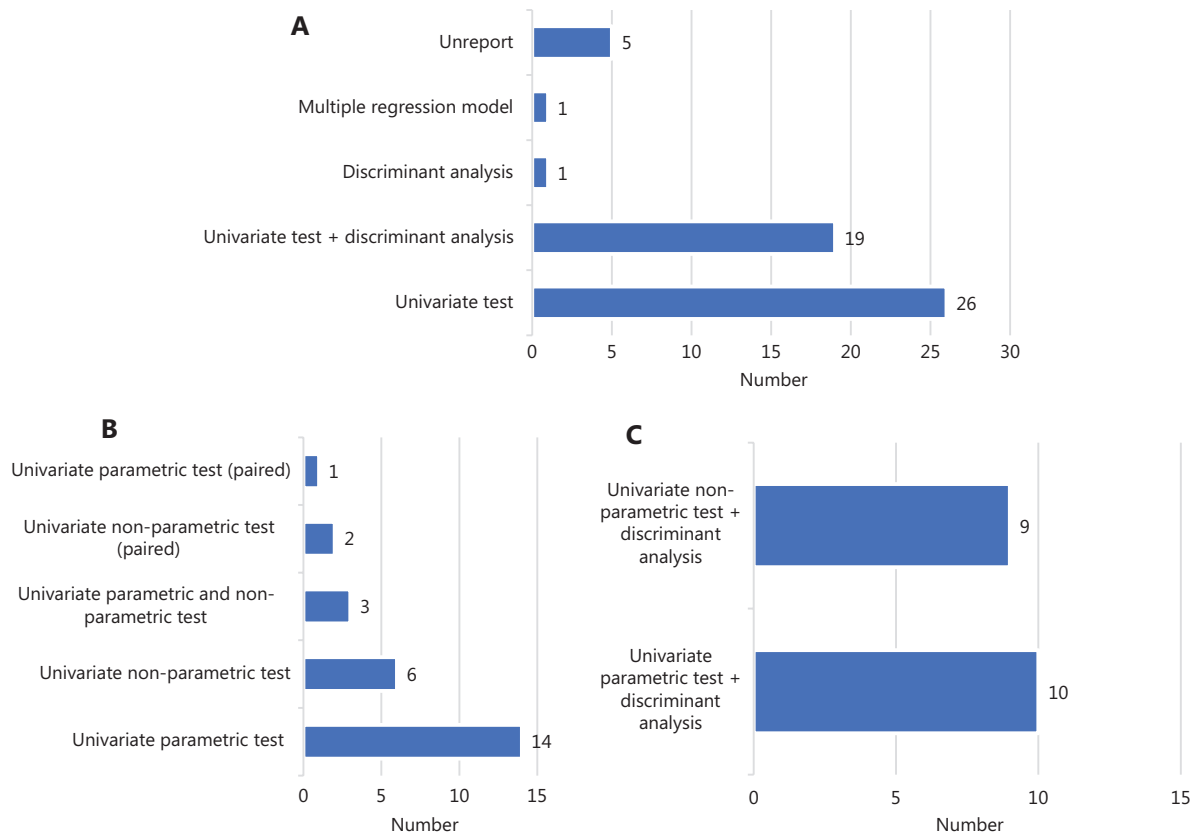

**Figure S1** Summary of the biomarker detection methods used in the included studies. (A) Biomarker detection methods used. (B) Univariate test methods. (C) Combination of univariate and discriminant analyses.

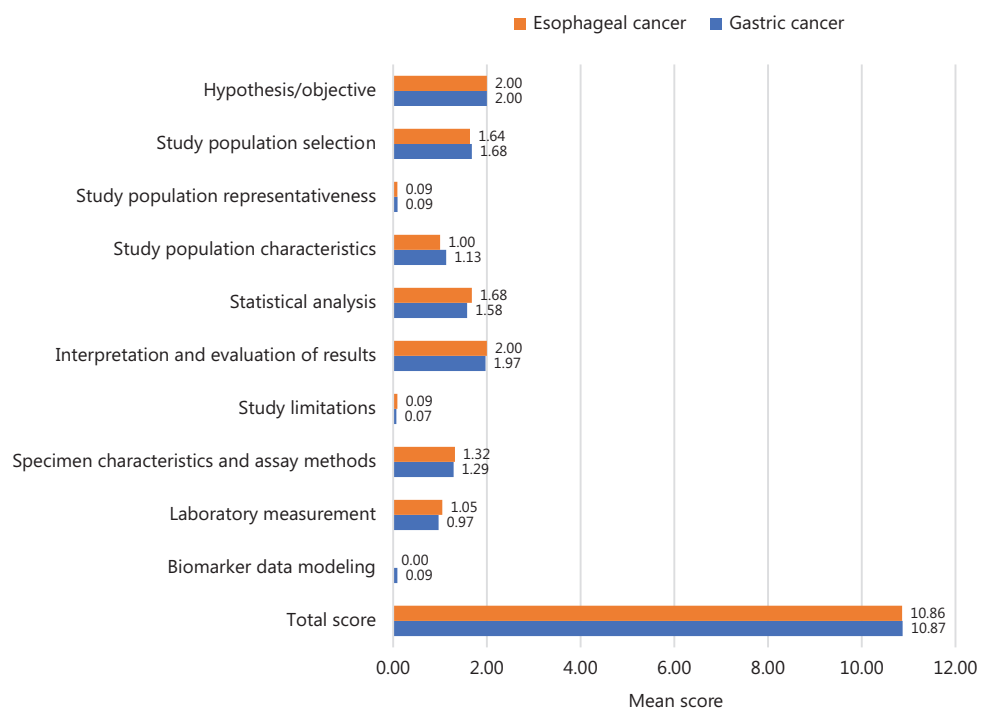

**Figure S2** Quality assessment of included studies using BIOCROSS.

**Table S1** Summary of literature search strategies

| Database       | Search strategies                                                                                                                                                                                                                                                                                                                                                                                                     | Results |
|----------------|-----------------------------------------------------------------------------------------------------------------------------------------------------------------------------------------------------------------------------------------------------------------------------------------------------------------------------------------------------------------------------------------------------------------------|---------|
| PubMed         | [mass spectrometry (Title/Abstract) OR nuclear magnetic resonance spectroscopy (Title/Abstract) OR metabolomics (Title/Abstract) OR metabonomic (Title/Abstract) OR metabolic profiling (Title/Abstract)] AND [stomach neoplasms (MeSH Terms) OR esophageal neoplasms (MeSH Terms)]                                                                                                                                   | 427     |
| Web of Science | [TI = (mass spectrometry) OR TI = (nuclear magnetic resonance spectroscopy) OR TI = metabolomic OR TI = metabonomic OR TI = (metabolic profiling)] AND [TI = (stomach neoplasms) OR TI = (gastric cancer) OR TI = (stomach cancer) OR TI = (gastric carcinoma) OR TI = (esophageal neoplasms) OR TI = (esophageal cancer) OR TI = (carcinoma of esophagus) OR TI = (esophageal carcinoma) OR TI = (esophagus cancer)] | 72      |
| EMBASE         | ("mass spectrometry":ab OR "nuclear magnetic resonance spectroscopy":ab OR metabolomic:ab OR metabonomic:ab OR "metabolic profiling":ab) AND ("stomach neoplasms":ab OR "gastric cancer":ab OR "stomach cancer":ab OR "gastric carcinoma":ab OR "esophageal neoplasms":ab OR "esophageal cancer":ab OR "carcinoma of esophagus":ab OR "esophageal carcinoma":ab OR "esophagus cancer":ab)                             | 597     |

**Table S2** Quality assessment of included studies using the Newcastle–Ottawa Scale (NOS)

| Study                                                                | Group | Selection                    |                                 |                       | Comparability          |                                      | Exposure                  |                                                     | Total |                   |
|----------------------------------------------------------------------|-------|------------------------------|---------------------------------|-----------------------|------------------------|--------------------------------------|---------------------------|-----------------------------------------------------|-------|-------------------|
|                                                                      |       | Adequate definition of cases | Representativeness of the cases | Selection of controls | Definition of controls | Comparability of cases and controls* | Ascertainment of exposure | Same method of ascertainment for cases and controls |       | Non-response rate |
| Lee GB (Anal Chim Acta) 2019                                         | GC    | ☆                            | ★                               | ★                     | ★                      | ★★                                   | ★                         | ★                                                   | ★     | 8                 |
| Xiu FM (Academic Journal of Second Military Medical University) 2018 | GC    | ☆                            | ☆                               | ☆                     | ★                      | ★★☆                                  | ★                         | ★                                                   | ★     | 5                 |
| Corona G (Int J Mol Sci) 2018                                        | GC    | ★                            | ★                               | ★                     | ★                      | ★★☆                                  | ★                         | ★                                                   | ★     | 8                 |
| Tokunaga M (Int J Oncol) 2018                                        | EC    | ☆                            | ☆                               | ☆                     | ☆                      | ★★                                   | ★                         | ★                                                   | ★     | 5                 |
| Jing FY (tubmb Life) 2018                                            | EC    | ☆                            | ☆                               | ☆                     | ☆                      | ★★                                   | ★                         | ★                                                   | ★     | 5                 |
| Ma W (J Pharm Biomed Anal) 2018                                      | EC    | ☆                            | ☆                               | ☆                     | ★                      | ★★                                   | ★                         | ★                                                   | ★     | 6                 |
| Lario, S (Sci Rep) 2017                                              | GC    | ★                            | ★                               | ★                     | ★                      | ★★☆                                  | ★                         | ★                                                   | ★     | 8                 |
| Zhang H (Biochem Biophys Res Commun) 2017                            | EC    | ★                            | ☆                               | ☆                     | ☆                      | ★★                                   | ★                         | ★                                                   | ★     | 6                 |
| Cheng J (Biochem Biophys Res Commun) 2017                            | EC    | ☆                            | ☆                               | ☆                     | ★                      | ★★                                   | ★                         | ★                                                   | ★     | 6                 |
| Cheng J (Comb Chem High Throughput Screen) 2017                      | EC    | ★                            | ☆                               | ☆                     | ★                      | ★★                                   | ★                         | ★                                                   | ★     | 7                 |
| Zhu X (Gastroenterol Res Pract) 2017                                 | EC    | ☆                            | ☆                               | ☆                     | ☆                      | ★★☆                                  | ★                         | ★                                                   | ★     | 4                 |
| Reed MA (Neoplasia) 2017                                             | EC    | ☆                            | ☆                               | ☆                     | ★                      | ☆☆                                   | ★                         | ★                                                   | ★     | 4                 |
| Wang DG (Oncotarget) 2017                                            | GC    | ★                            | ☆                               | ☆                     | ★                      | ★★                                   | ★                         | ★                                                   | ★     | 7                 |
| Choi JM (Biomed Chromatogr) 2016                                     | GC    | ☆                            | ☆                               | ☆                     | ★                      | ★★☆                                  | ★                         | ★                                                   | ★     | 5                 |
| Wang H (BMC Cancer) 2016                                             | GC    | ☆                            | ☆                               | ☆                     | ☆                      | ★★                                   | ★                         | ★                                                   | ★     | 4                 |
| Chan AW (Br J Cancer) 2016                                           | GC    | ☆                            | ☆                               | ☆                     | ★                      | ★★                                   | ★                         | ★                                                   | ★     | 6                 |
| Kuligowski J (J Proteome Res) 2016                                   | GC    | ☆                            | ☆                               | ☆                     | ★                      | ☆☆                                   | ★                         | ★                                                   | ★     | 4                 |
| Xu J (Sci Rep) 2016                                                  | EC    | ★                            | ☆                               | ☆                     | ★                      | ★★                                   | ★                         | ★                                                   | ★     | 7                 |
| Liang Q (Appl Biochem Biotechnol) 2015                               | GC    | ☆                            | ☆                               | ☆                     | ★                      | ★★                                   | ★                         | ★                                                   | ★     | 6                 |
| Mir SA (J Proteomics) 2015                                           | EC    | ☆                            | ☆                               | ☆                     | ★                      | ★★                                   | ★                         | ★                                                   | ★     | 6                 |
| Jung J (Ann Surg Oncol) 2014                                         | GC    | ☆                            | ☆                               | ☆                     | ★                      | ★★                                   | ★                         | ★                                                   | ★     | 6                 |
| Lo WY (Clin Chim Acta) 2014                                          | GC    | ☆                            | ☆                               | ☆                     | ★                      | ★★                                   | ★                         | ★                                                   | ★     | 6                 |

Table S2 Continued

| Study                                               | Group     | Selection                    |                                 |                       | Comparability          |                                      | Exposure                  |                                                     | Total |                   |
|-----------------------------------------------------|-----------|------------------------------|---------------------------------|-----------------------|------------------------|--------------------------------------|---------------------------|-----------------------------------------------------|-------|-------------------|
|                                                     |           | Adequate definition of cases | Representativeness of the cases | Selection of controls | Definition of controls | Comparability of cases and controls* | Ascertainment of exposure | Same method of ascertainment for cases and controls |       | Non-response rate |
| Chen JL (Electrophoresis) 2014                      | GC        | ☆                            | ☆                               | ☆                     | ★                      | ☆☆                                   | ★                         | ★                                                   | ★     | 4                 |
| Hur H (PLoS One) 2014                               | GC        | ☆                            | ☆                               | ☆                     | ☆                      | ★★                                   | ★                         | ★                                                   | ★     | 5                 |
| Yang T (Se Pu) 2014                                 | GC        | ☆                            | ☆                               | ☆                     | ★                      | ☆☆                                   | ★                         | ★                                                   | ★     | 4                 |
| Kwon SY (Open Proteomics Journal) 2014              | GC        | ☆                            | ☆                               | ☆                     | ☆                      | ★★                                   | ★                         | ★                                                   | ★     | 5                 |
| Yang Y (Anal Bioanal Chem) 2013                     | EC        | ☆                            | ☆                               | ☆                     | ☆                      | ★★                                   | ★                         | ★                                                   | ★     | 5                 |
| Zhang X (Biochim Biophys Acta) 2013                 | EC        | ☆                            | ☆                               | ☆                     | ★                      | ☆☆                                   | ★                         | ★                                                   | ★     | 4                 |
| Liu R (Int J Mol Sci) 2013                          | EC        | ☆                            | ☆                               | ☆                     | ★                      | ★★                                   | ★                         | ★                                                   | ★     | 6                 |
| Wang L (Molecular cancer) 2013                      | EC        | ☆                            | ☆                               | ☆                     | ☆                      | ★★                                   | ★                         | ★                                                   | ★     | 5                 |
| Song H (Chinese Journal of Clinical Nutrition) 2013 | GC        | ☆                            | ☆                               | ☆                     | ★                      | ★★                                   | ★                         | ★                                                   | ★     | 6                 |
| Ikeda A (Biomed Chromatogr) 2012                    | GC and EC | ☆                            | ☆                               | ☆                     | ★                      | ☆☆                                   | ★                         | ★                                                   | ★     | 5                 |
| Song H (Braz J Med Biol Res) 2012                   | GC        | ☆                            | ☆                               | ☆                     | ★                      | ★★                                   | ★                         | ★                                                   | ★     | 6                 |
| Aa J (Metabolomics) 2012                            | GC        | ☆                            | ☆                               | ☆                     | ★                      | ★★                                   | ★                         | ★                                                   | ★     | 6                 |
| Hasim A (Mol Biol Rep) 2012                         | EC        | ☆                            | ☆                               | ☆                     | ★                      | ★★                                   | ★                         | ★                                                   | ★     | 6                 |
| Zhang J (PLoS One) 2012                             | EC        | ☆                            | ☆                               | ☆                     | ★                      | ☆☆                                   | ★                         | ★                                                   | ★     | 4                 |
| Davis VW (World J Surg Oncol) 2012                  | EC        | ☆                            | ★                               | ☆                     | ★                      | ★★                                   | ★                         | ★                                                   | ★     | 7                 |
| Song H (Chin Med J) 2012                            | GC        | ☆                            | ☆                               | ☆                     | ☆                      | ★★                                   | ★                         | ★                                                   | ★     | 5                 |
| Sun M (Chinese Journal of Gastroenterology) 2011    | GC        | ☆                            | ☆                               | ☆                     | ★                      | ☆☆                                   | ★                         | ★                                                   | ★     | 4                 |
| Yu L (J Gastroenterol Hepatol) 2011                 | GC        | ☆                            | ☆                               | ☆                     | ★                      | ☆☆                                   | ★                         | ★                                                   | ★     | 5                 |
| Song H (Oncol Rep) 2011                             | GC        | ☆                            | ☆                               | ☆                     | ☆                      | ★★                                   | ★                         | ★                                                   | ★     | 5                 |
| Zhang J (J Thorac Cardiovasc Surg) 2011             | EC        | ★                            | ☆                               | ☆                     | ★                      | ☆☆                                   | ★                         | ★                                                   | ★     | 5                 |
| Wu H (Anal Bioanal Chem) 2010                       | GC        | ☆                            | ☆                               | ☆                     | ☆                      | ★★                                   | ★                         | ★                                                   | ★     | 5                 |
| Yakoub D (Cancer Res) 2010                          | EC        | ☆                            | ☆                               | ☆                     | ★                      | ☆☆                                   | ★                         | ★                                                   | ★     | 5                 |

**Table S2** Continued

| Study                                               | Group | Selection                    |                                 |                       | Comparability          |                                      | Exposure                  |                                                     | Total |
|-----------------------------------------------------|-------|------------------------------|---------------------------------|-----------------------|------------------------|--------------------------------------|---------------------------|-----------------------------------------------------|-------|
|                                                     |       | Adequate definition of cases | Representativeness of the cases | Selection of controls | Definition of controls | Comparability of cases and controls* | Ascertainment of exposure | Same method of ascertainment for cases and controls |       |
| Cai Z (Mol Cell Proteomics) 2010                    | GC    | ☆                            | ☆                               | ☆                     | ☆                      | ★★                                   | ★                         | ★                                                   | 5     |
| Djukovic D (Rapid Commun Mass Spectrom) 2010        | EC    | ☆                            | ☆                               | ☆                     | ★                      | ☆☆                                   | ★                         | ★                                                   | 4     |
| Ayshamgul H (Chin J Oncol) 2010                     | EC    | ☆                            | ☆                               | ☆                     | ★                      | ☆☆                                   | ★                         | ★                                                   | 5     |
| Hirayama A (Cancer Res) 2009                        | GC    | ☆                            | ☆                               | ☆                     | ☆                      | ★★                                   | ★                         | ★                                                   | 5     |
| Wu H (J Chromatogr B) 2009                          | EC    | ☆                            | ☆                               | ☆                     | ☆                      | ★★                                   | ★                         | ★                                                   | 5     |
| Calabrese C (Cancer Epidemiol Biomarkers Prev) 2008 | GC    | ☆                            | ☆                               | ☆                     | ★                      | ☆☆                                   | ★                         | ★                                                   | 4     |
| Tugnoli V (Oncol Rep) 2006                          | GC    | ☆                            | ☆                               | ☆                     | ★                      | ☆☆                                   | ★                         | ★                                                   | 4     |
| Mun CW (Magn Reson Imaging) 2004                    | GC    | ☆                            | ☆                               | ☆                     | ☆                      | ★★                                   | ★                         | ★                                                   | 5     |

\*A maximum of 2 stars can be given in this category. GC, gastric cancer; EC, esophageal cancer.
